# Supplementary material for: Temperature, ozone, and mortality in urban and non-urban counties in the northeastern United States
Source: PubMed Central journal article supplement (PMC4417233; doi:10.1186/1476-069x-14-3), 2015-01-07

Figure S.1. Example of kriging of 8-hour maximum ozone concentrations for July 18, 1999 within the northeastern US domain. For the health analysis, we used data kriged to the population-weighted county centroids in NY, NJ, and CT, as shown in the lower left hand panel.

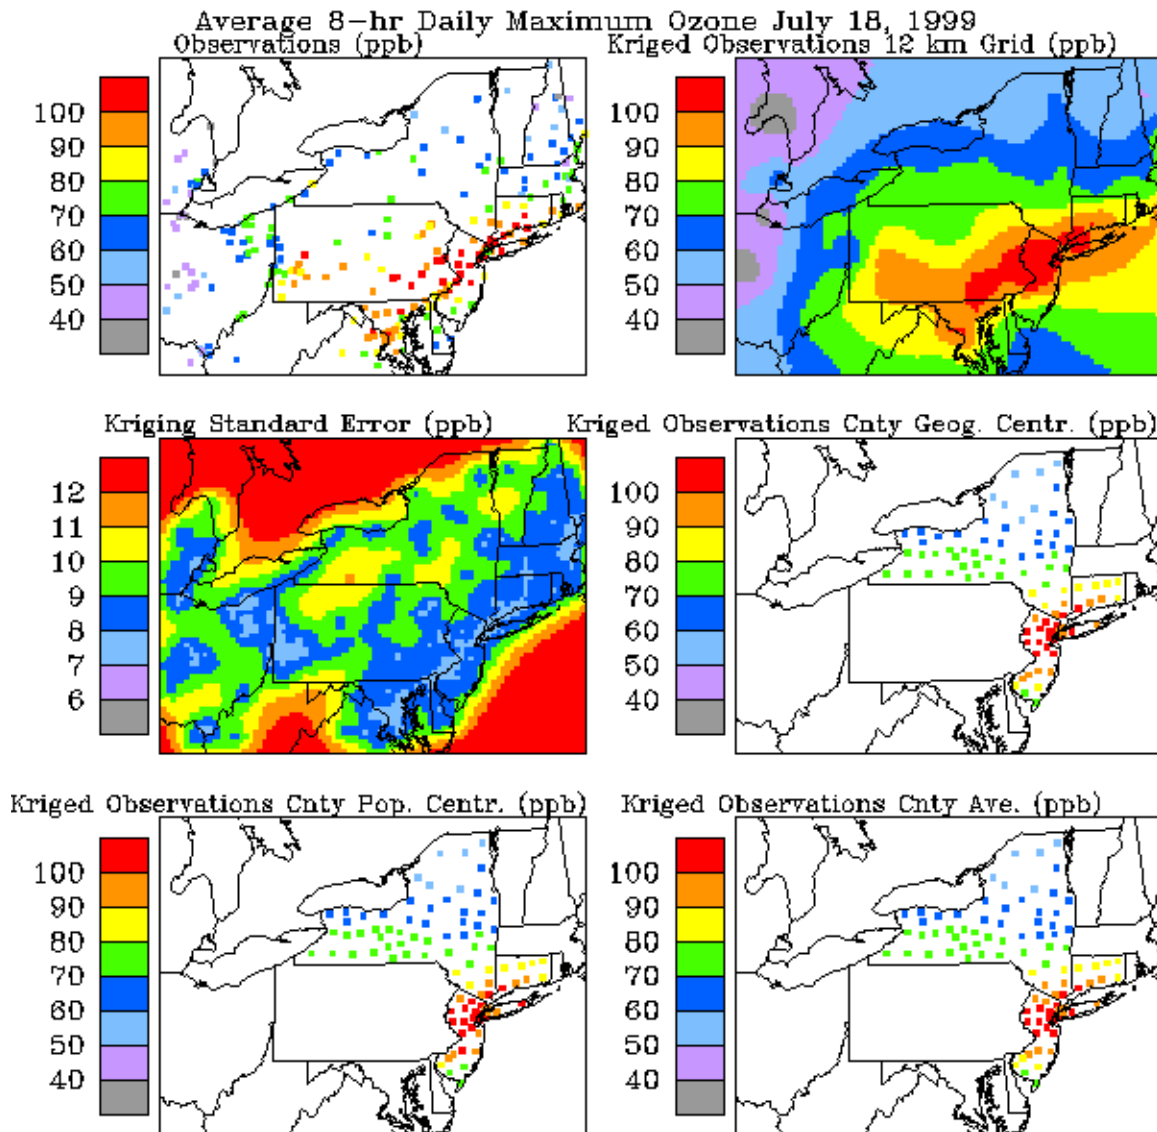

Figure S.2. Example of kriging of daily maximum temperature for July 18, 1999 within the northeastern US domain. For the health analysis, we used data kriged to the population-weighted county centroids in NY, NJ, and CT, as shown in the lower left hand panel.

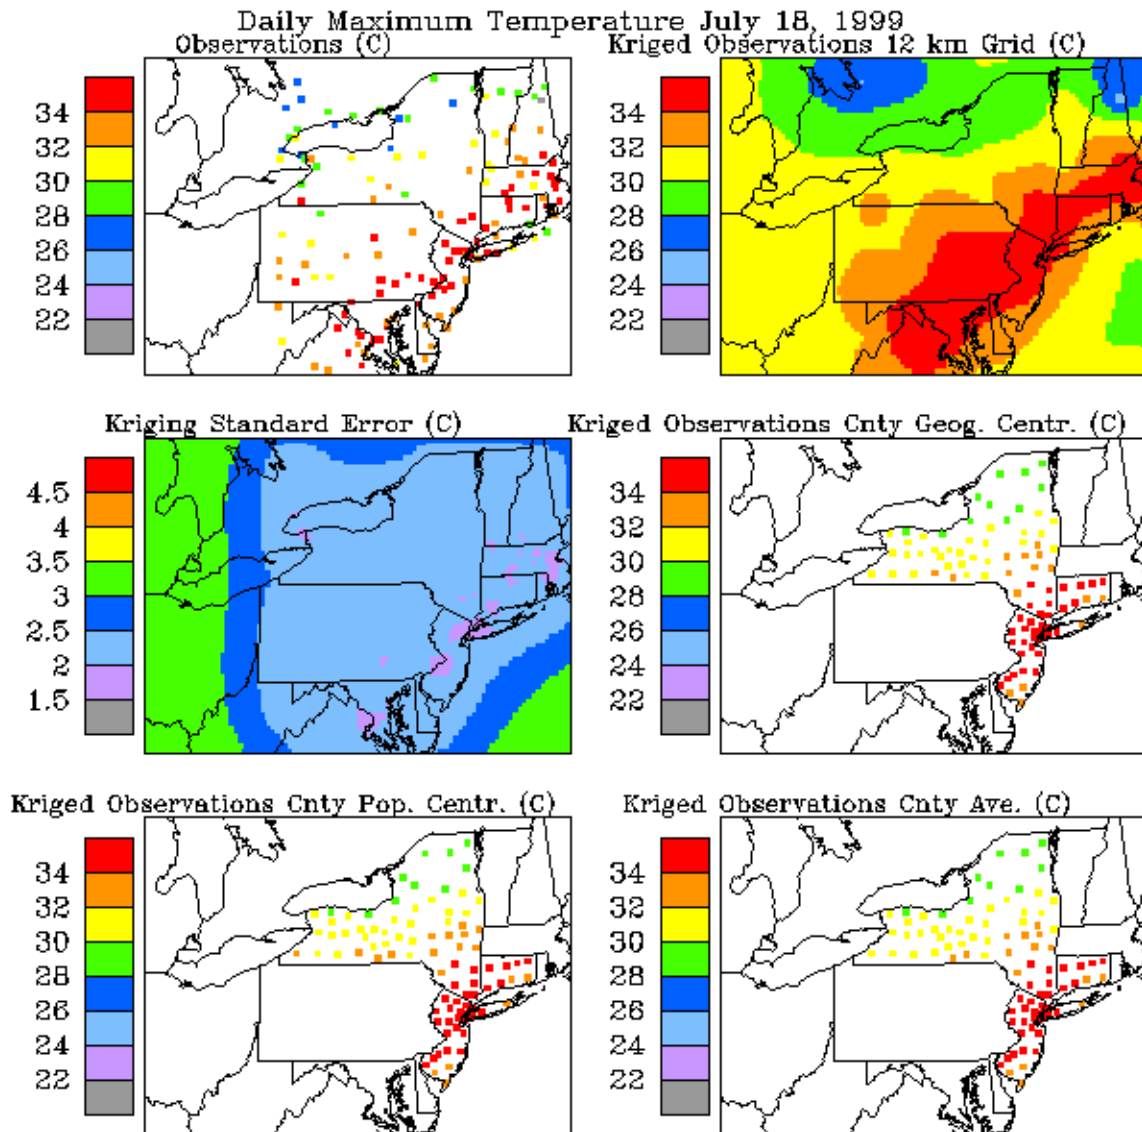

Supplement: 12940_2014_840_MOESM1_ESM.pdf [file 12940_2014_840_MOESM1_ESM.pdf]
